# Supplementary material for: Sensitive fluorescence detection of DNA using isothermal exponential amplification coupled quantum dots coated silica nanospheres as label
Source: Royal Society of Chemistry journal article supplement (doi:10.1039/c3ra41649f), 2013-01-01
Supplement: c3ra41649f.pdf [file c3ra41649f.pdf]

Electronic Supplementary Information (ESI) for RSC Advances

This journal is (c) The Royal Society of Chemistry 2013

## Sensitive fluorescence detection of DNA using isothermal exponential amplification coupled quantum dots coated silica nanosphere as label

Fenglei Gao, Jianping Lei and Huangxian Ju\*

State Key Laboratory of Analytical Chemistry for Life Science, School of Chemistry and Chemical Engineering, Nanjing University, Nanjing 210093, P.R. China

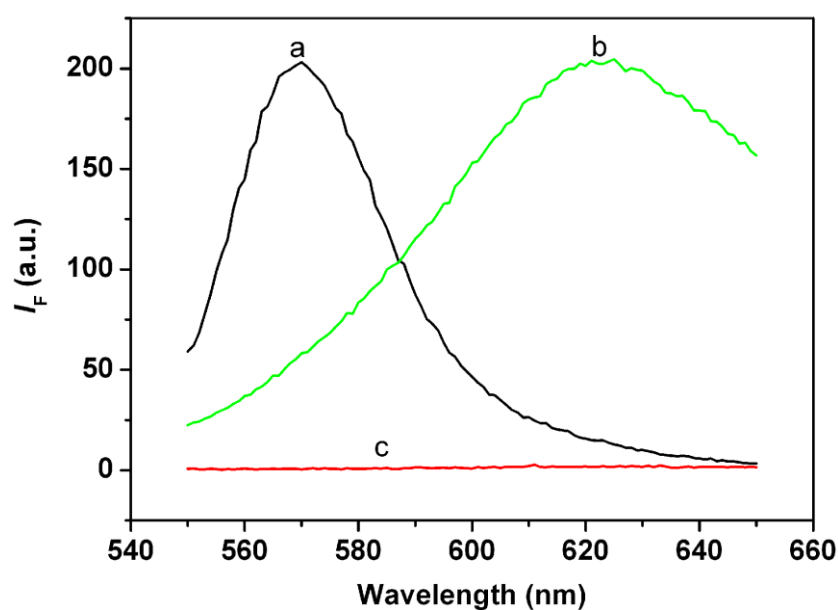

**Fig. S1** Fluorescence spectra of (a)  $0.1 \mu\text{mol L}^{-1}$  Rhod-5N, (b)  $10 \mu\text{mol L}^{-1}$  CdTe QDs and (c)  $10 \mu\text{mol L}^{-1}$  QDs after dissolved by  $\text{HNO}_3$  at the excitation wavelength of 540 nm with a slit width of 3 nm.
